# Supplementary material for: Occupational Heat Stress Profiles in Selected Workplaces in India
Source: MDPI journal article supplement (doi:10.3390/ijerph13010089), 2015-12-29
Supplement: s1 [file s1]

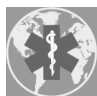

# Occupational Heat Stress Profiles in Selected Workplaces in India

## Main Study Questionnaire

### Part 1 General Information about Person Interviewed and the Organization She/He Represents

1. Name:
2. ID No:
3. Date of interview:
4. Name of the interviewer:
5. Name of the industry:
6. Location of the industry:
7. Type of industry:
8. Age:
9. Age group: ☐<sub>1</sub> 10–20/☐<sub>2</sub> 21–30/☐<sub>3</sub> 31–40/☐<sub>4</sub> 41–50/☐<sub>5</sub> 51–60/☐<sub>6</sub> 61–70
10. Sex: ☐<sub>1</sub> Male/☐<sub>2</sub> Female
11. Education: ☐<sub>1</sub> Illiterate/☐<sub>2</sub> Primary/☐<sub>3</sub> Secondary/☐<sub>4</sub> Higher Secondary/☐<sub>5</sub> University/  
☐<sub>6</sub> Polytechnic/Diploma
12. Designation: ☐<sub>1</sub> Worker/☐<sub>2</sub> Supervisory/☐<sub>3</sub> Manager
13. Worker category:
14. Smoking: ☐<sub>1</sub> Smoker/☐<sub>2</sub> Non Smoker/☐<sub>3</sub> Ex smoker
15. Consuming alcohol: ☐<sub>1</sub> Yes/☐<sub>2</sub> No/☐<sub>3</sub> Ex
16. Any existing illness: ☐<sub>1</sub> Diabetes/☐<sub>2</sub> Hypertension/☐<sub>3</sub> Respiratory illness, specify/☐<sub>4</sub> Others, specify/  
☐<sub>5</sub> None

### Part 2 Questions Concerning the Type of Work

1. Type of work: ☐<sub>1</sub> Light/☐<sub>2</sub> Moderate/☐<sub>3</sub> Heavy/☐<sub>4</sub> Very Heavy
2. What was your previous job and where (relating to temp)? \_\_\_\_\_
3. How long you are employed here? \_\_\_\_\_ years/months (more than 6 months means acclimatized)
4. How many hours per day do you usually work excluding regular break timings? \_\_\_\_\_
5. Do you work near a direct heat source(naked flame/hot air/outdoors/radiant heat)  
☐<sub>1</sub> Yes/☐<sub>2</sub> No
6. Is the place you work well-ventilated? ☐<sub>1</sub> Yes/☐<sub>2</sub> No
7. Do you have additional breaks during summer? ☐<sub>1</sub> Yes/☐<sub>2</sub> No
  - a. If yes, mention no. of hours/minutes \_\_\_\_\_

### Part 3 Questions in Relation to Heat Exposure at Work

1. Are you comfortable with the ambient temperature? ☐<sub>1</sub> Yes/☐<sub>2</sub> No
2. Is heat exposure a problem during the hot season? ☐<sub>1</sub> Yes/☐<sub>2</sub> No
3. How many months do you feel hot /uncomfortably hot in this workplace?  
☐<sub>1</sub> 1–3 months/☐<sub>2</sub> 4–6 months/☐<sub>3</sub> 7–9 months/☐<sub>4</sub> 9–12 months/☐<sub>5</sub> Never
4. Describe how bad the heat stress can be in the hot season.  
☐<sub>1</sub> Extremely bad/☐<sub>2</sub> Very bad/ ☐<sub>3</sub> Bad/☐<sub>4</sub> Manageable/☐<sub>5</sub> No stress at all

**Part 4 Questions Concerning Impacts of Heat on Health**

1. Have you ever had these symptoms at work?

- a. Excessive sweating ☐<sub>1</sub> Yes/☐<sub>2</sub> No
- b. Muscle/Heat cramps ☐<sub>1</sub> Yes/☐<sub>2</sub> No
- c. Thirst ☐<sub>1</sub> Yes/☐<sub>2</sub> No
- d. Tiredness/weakness/☐<sub>1</sub> Yes/☐<sub>2</sub> No
- e. dizziness☐<sub>1</sub> Yes/☐<sub>2</sub> No
- f. headache ☐<sub>1</sub> Yes/☐<sub>2</sub> No
- g. nausea or vomiting☐<sub>1</sub> Yes/☐<sub>2</sub> No
- h. fainting☐<sub>1</sub> Yes/☐<sub>2</sub> No
- i. Prickly heat ☐<sub>1</sub> Yes/☐<sub>2</sub> No
- j. Heat stroke ☐<sub>1</sub> Yes/☐<sub>2</sub> No
- k. Others \_\_\_\_\_

**Part 5 Questions Concerning Impacts of Heat on Worker's Productivity**

1. Have you ever taken sick leave/permission due to heat? ☐<sub>1</sub> Yes/☐<sub>2</sub> No

a. If yes, approx. how many hours/days in a week/month? \_\_\_\_\_

2. Have you lost any wages due to absenteeism in summer months? ☐<sub>1</sub> Yes/☐<sub>2</sub> No

a. If yes, how much \_\_\_\_\_? (currency)

3. Have you ever been advised/ever been admitted in hospital/medical centre to take off due to heat related illness? ☐<sub>1</sub> Yes/☐<sub>2</sub> No

a. If yes, approximately how many days \_\_\_\_\_

4. How does heat affect other aspects of your work (during hot seasons)

☐<sub>1</sub> Absenteeism/☐<sub>2</sub> Less productivity/☐<sub>3</sub> Irritation/Interpersonal issues/Work related issues with manager/☐<sub>4</sub> Take more time to complete same task

5. Do you have production target? ☐<sub>1</sub> Yes/☐<sub>2</sub> No

a. If Yes, how much? \_\_\_\_\_

6. Do you complete your production target? ☐<sub>1</sub> Yes/☐<sub>2</sub> No

a. If no, how much target is not completed? \_\_\_\_\_units

7. To achieve production target or complete work do you have to work extra hours?

☐<sub>1</sub> Yes/☐<sub>2</sub> No

a. If yes, how many extra hours \_\_\_\_\_

**Part 6 Questions Concerning Impacts of Clothing on Heat Stress and Productivity**

1. Dress material of the workers (Indian equivalent to ACGIH)

☐<sub>1</sub> Breathable cotton/☐<sub>2</sub> Thick cotton overall/☐<sub>3</sub> Rayon/Nylon/  
☐<sub>4</sub> Plastic PPE/☐<sub>5</sub> Others \_\_\_\_\_

2. Worker perception about dress Material of the worker:

☐<sub>1</sub>Comfortable/☐<sub>2</sub> Moderately comfortable/☐<sub>3</sub> Uncomfortable/☐<sub>4</sub> Others \_\_\_\_\_

3. If uncomfortable, can you give any suggestions to improve? \_\_\_\_\_

4. Do you feel hotter with uniform/Does the Dress Material increase heat stress/comfort?

☐<sub>1</sub> Sure/☐<sub>2</sub> Maybe/☐<sub>3</sub> Not sure/☐<sub>4</sub> No, not at all

5. Does clothing reduce your work output?

☐<sub>1</sub> Sure/☐<sub>2</sub> Maybe/☐<sub>3</sub> Not sure/☐<sub>4</sub> No, not at all

**Part 7 Questions Concerning Coping Mechanisms**

1. How do you limit heat exposure/cope with heat exhaustion, when needed?  
☐<sub>1</sub> take rest/☐<sub>2</sub> Change/remove clothing/☐<sub>3</sub> drink water/☐<sub>4</sub> cool shower, bath, or sponge bath/☐<sub>5</sub> move to an air-conditioned/cooler environment/☐<sub>6</sub> any other method, do specify \_\_\_\_\_
2. Is sufficient water available at all times when you need it? ☐<sub>1</sub> Yes/☐<sub>2</sub> No
3. Do you drink water at work? ☐<sub>1</sub> Yes/☐<sub>2</sub> No
  - b. If yes, how much? \_\_\_\_\_
4. Do you take any traditional special diet to cope with heat? ☐<sub>1</sub> Yes/☐<sub>2</sub> No
5. What traditional or other methods do you adopt for coping with heat?  
 \_\_\_\_\_
6. Do you spend more money during hot seasons to cope with heat? ☐<sub>1</sub> Yes/☐<sub>2</sub> No
  - a. If yes, specify \_\_\_\_\_ (Currency units)
7. Do you spend more time to cope with heat? ☐<sub>1</sub> Yes/☐<sub>2</sub> No
  - a. If yes how much \_\_\_\_\_ (min/h)—convert to % of productivity time or personal time
8. Does the time spent on coping heat impact your social life? ☐<sub>1</sub> Yes/☐<sub>2</sub> No
9. How does it affect your social life? ☐<sub>1</sub> Moderately/☐<sub>2</sub> Highly/☐<sub>3</sub> Extremely/☐<sub>4</sub> No impact

**Part 8 Questions Concerning Access to Toilets**

1. Do you have access to toilets at work? ☐<sub>1</sub> Yes/☐<sub>2</sub> No

**Part 9 Questions If You Have Access to Toilets**

1. Do you use the toilets? ☐<sub>1</sub> Yes/☐<sub>2</sub> No
  - a. If yes: How often
    - a. 1–2 times per day
    - b. 3–4 times per day
    - c. 5–6 times per day
    - d. >6 times per day
  - b. If no: Why not
    - a. They are too far away
    - b. Difficulties to get away from work
    - c. They are too dirty
    - d. Others
2. Can you talk about it in the open? ☐<sub>1</sub> Yes/☐<sub>2</sub> No
  - a. If no: Why not
    - a. It makes you feel uncomfortable
    - b. It is taboo
    - c. People around you would treat you outrageous
    - d. Others

**Part 10 Questions If You Don't Have Access to Toilets**

1. How often do you go to urinate and defecate?
  - a. 0 times
  - b. 1–2 times

- c. 3–4 times
  - d. 5–6 times
  - e. >6 times
- If b–e:
- 2. Where do you go to urinate and defecate?
    - a. An hidden area (small building *etc.*)
    - b. In the forest
    - c. On the streets
    - d. Others
  - 3. Do you go alone? ☐<sub>1</sub> Yes/☐<sub>2</sub> No
  - 4. Do you feel comfortable with that option? ☐<sub>1</sub> Yes/☐<sub>2</sub> No
    - a. If no: Why not?
      - a. Feel scared
      - b. Needs to hold it for longer than convenient
      - c. Feel uncomfortable
      - d. Others
  - 5. Have something inconvenient happened to you when you go for urination or defecation? ☐<sub>1</sub> Yes/☐<sub>2</sub> No
    - a. If yes: What have happened
      - a. Bitten by an animal
      - b. Someone has been watching
      - c. Assaulted
      - d. Others
  - 6. Do you feel that you have to hold it for longer time than convenient? ☐<sub>1</sub> Yes/☐<sub>2</sub> No
    - a. If yes: For how long approximately?
      - a. 1–2 h
      - b. 3–4 h
      - c. 4–5 h
      - d. >6 h
  - 7. Do you sometimes have to stay home from work because of the toilet situation during some stomach infection or similar situation? ☐<sub>1</sub> Yes/☐<sub>2</sub> No
    - a. If yes: How often
      - a. Once per year
      - b. 2–5 times per year
      - c. 6–11 times per year
      - d. Once per month
      - e. More than 1 time per month
  - 8. Do you think your working situation would be better if you had access to toilets? ☐<sub>1</sub> Yes/☐<sub>2</sub> No

#### Part 11 Questions Concerning Reproduction History and Menstrual History

- 1. Is your menstrual cycle regular? ☐<sub>1</sub> Yes/☐<sub>2</sub> No/ ☐<sub>3</sub> Others
  - a. If yes: Can you work during your menstrual cycle? ☐<sub>1</sub> Yes/☐<sub>2</sub> No/☐<sub>3</sub> Others

- b. If no: Why not?
  - a. Nowhere to take care of sanitary pads
  - b. Feel to dirty
  - c. Not allowed
  - d. Lack of toilets
  - e. Others
2. Do you have access to sanitary pads during your menstrual cycle? ☐<sub>1</sub> Yes/☐<sub>2</sub> No
3. Do you have access to a place to change sanitary pads during your menstrual cycle? ☐<sub>1</sub> Yes/☐<sub>2</sub> No
  - a. If yes: Do you go there? ☐<sub>1</sub> Yes/☐<sub>2</sub> No
  - b. If no: Why not
    - a. It is too far away
    - b. It is to dirty
    - c. It is not private enough
    - d. Afraid that someone will be aware of you menstrual cycle
    - e. Others
4. If you don't have access: How do you manage?
  - a. Go somewhere else
  - b. Wait the whole day
  - c. Stay home from work
  - d. Others

## Part 12 Questions Concerning Access to Drinking Water

1. Do you have access to drinking water at your work? ☐<sub>1</sub> Yes/☐<sub>2</sub> No
  - a. If yes: From where do you get that water?
    - a. From a water tank
    - b. Water bottles
    - c. A river or lake *etc.* close to the area
    - d. Others
2. Do you drink when you feel thirst? ☐<sub>1</sub> Yes/☐<sub>2</sub> No
  - a. If no: why not?
    - a. Not access to water
    - b. It will be to difficult to hold it
    - c. The work do not allow it
    - d. Others
3. Do you think you would drink more if you had better access to toilets? ☐<sub>1</sub> Yes/☐<sub>2</sub> No
  - a. If no: Why not?
    - a. The access to water is not good
    - b. The work does not allow it
    - c. Others

## Part 13 Questions Concerning Effects on Daily Life

1. Does the toilet situation impact your social life? ☐<sub>1</sub> Yes/☐<sub>2</sub> No

- a. If yes: How?
  - a. Have to stay home more than if there had been toilets
  - b. Feeling tired
  - c. Others

#### Part 14 Questions Concerning Urinary Tract Infection

1. Do you have burning sensation during urination? ☐<sub>1</sub> Yes/☐<sub>2</sub> No
  - a. If yes: How often?
    - a. Every day
    - b. Few days a week
    - c. Once a week
    - d. Less than once a week
  - b. If yes: For how long?
    - a. The last week
    - b. The last month
    - c. The last 6 months
    - d. Longer than 6 months
2. Do you have difficulties to hold it? ☐<sub>1</sub> Yes/☐<sub>2</sub> No
3. Do you feel difficulty while urinating even if it is needed? ☐<sub>1</sub> Yes/☐<sub>2</sub> No
  - a. If yes: How often?
    - a. The last week
    - b. The last month
    - c. The last 6 months
    - d. Longer than 6 months
4. Do you think this problem would have been better if you had better access to toilets?  
☐<sub>1</sub> Yes/☐<sub>2</sub> No
5. Have you ever been admitted to hospital/medical centre due to urinal or defecation problems?  
☐<sub>1</sub> Yes/☐<sub>2</sub> No
  - a. If yes: Approximately for how many days? \_\_\_\_\_

#### Part 15 Questions Concerning Kidney Problems

2. Have you noticed changes in your urine volume? ☐<sub>1</sub> Yes/☐<sub>2</sub> No
3. Do you have excessive tiredness or skin itching? ☐<sub>1</sub> Yes/☐<sub>2</sub> No
4. Do you have numbness or swollen legs or hands due to water retention?  
☐<sub>1</sub> Yes/☐<sub>2</sub> No
  - a. If Yes to 1,2 and 3, What is the color of your urine?
    - (a) Reddish
    - (b) Dark Yellow
    - (c) Yellow
    - (d) Colorless
    - (e) Have not noticed
    - (f) Don't know
5. Have you been treated for kidney stones? ☐<sub>1</sub> Yes/☐<sub>2</sub> No
  - a. If yes: When? \_\_\_\_\_
6. Do you feel pain in the bottom of your back? ☐<sub>1</sub> Yes/☐<sub>2</sub> No

- a. If yes: For how long?
  - (a) The last week
  - (b) The last month
  - (c) The last 2–6 month
  - (d) Longer than the last 6 months
7. Do you think this problem would have been better if you had better access to toilets?  
☐<sub>1</sub> Yes/☐<sub>2</sub> No
8. Have you ever been admitted to hospital/medical centre because of kidney problems?  
☐<sub>1</sub> Yes/☐<sub>2</sub> No
  - a. If yes: Approximately for how many days? \_\_\_\_\_

**Part 16 Questions concerning dehydration**

1. Do you feel dehydrated? ☐<sub>1</sub> Yes/☐<sub>2</sub> No
2. Do you have any pressure ulcers? ☐<sub>1</sub> Yes/☐<sub>2</sub> No
3. Do you have any other skin conditions? ☐<sub>1</sub> Yes/☐<sub>2</sub> No
4. Do you have nausea or fainting spells? ☐<sub>1</sub> Yes/☐<sub>2</sub> No
5. Have you ever been admitted to hospital/medical centre due to dehydration?  
☐<sub>1</sub> Yes/☐<sub>2</sub> No
  - a. If yes: Approximately for how many days? \_\_\_\_\_
6. Do you think this problem would have been better if you had better access to toilets?  
☐<sub>1</sub> Yes/☐<sub>2</sub> No

**Part 17 Questions Concerning Drinking Defecated Water**

1. Do you feel constant hunger even if you are eating? ☐<sub>1</sub> Yes/☐<sub>2</sub> No
2. Do you have diarrhea? ☐<sub>1</sub> Yes/☐<sub>2</sub> No
3. Do you have diarrhea with blood and mucus? ☐<sub>1</sub> Yes/☐<sub>2</sub> No
4. Do you feel swollen in your stomach? ☐<sub>1</sub> Yes/☐<sub>2</sub> No
  - a. If yes: Which part?
    - (a) Upper part
    - (b) Lower part
    - (c) The whole belly
5. Do you feel itching around anus? ☐<sub>1</sub> Yes/☐<sub>2</sub> No
6. Do you feel cramps in your stomach? ☐<sub>1</sub> Yes/☐<sub>2</sub> No
7. Do you have fever? ☐<sub>1</sub> Yes/☐<sub>2</sub> No
  - a. If yes: How often
    - (a) Every day
    - (b) 1–6 days per week
    - (c) A few days per month
    - (d) A few days per year
    - (e) Less than a few days per year
8. Do you think this problem would have been better if you had better access to toilets?  
☐<sub>1</sub> Yes/☐<sub>2</sub> No
9. Have you ever been admitted to hospital/medical centre because of defecation problems?  
☐<sub>1</sub> Yes/☐<sub>2</sub> No
  - a. If yes: Approximately for how many days? \_\_\_\_\_

**Part 18 Questions Concerning Menstrual Cycle**

1. Do you wash yourself regularly during your menstrual cycle? ☐<sub>1</sub> Yes/☐<sub>2</sub> No
2. Do you feel itching around your genitals? ☐<sub>1</sub> Yes/☐<sub>2</sub> No

- a. If No, Do you think this problem would have been better if you had better access to toilets?  
☐<sub>1</sub> Yes/☐<sub>2</sub> No

#### Part 19 Questions Concerning Other Health Effects

1. Do you feel any other health problems than the ones mentioned above? ☐<sub>1</sub> Yes/☐<sub>2</sub> No
- a. If yes: What kind of health problems?
- \_\_\_\_\_
- b. If yes: Do you think they may be caused by lack of toilets? ☐<sub>1</sub> Yes/☐<sub>2</sub> No
2. Do you think it would be less health problems if you would drink more? ☐<sub>1</sub> Yes/☐<sub>2</sub> No

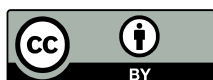

© 2015 by the authors; licensee MDPI, Basel, Switzerland. This article is an open access article distributed under the terms and conditions of the Creative Commons by Attribution (CC-BY) license (<http://creativecommons.org/licenses/by/4.0/>).
